# Supplementary material for: Unveiling symmetry: a comparative analysis of asymmetric and symmetric non-fullerene acceptors in organic solar cells
Source: Royal Society of Chemistry journal article supplement (doi:10.1039/d4tc00386a), 2024-01-01
Supplement: d4tc00386a2.xlsx [file d4tc00386a2.xlsx]

## Sheet: Sheet1
Compounds	HOMO (eV)	LUMO (eV)	LUMO+1 (eV)	Δ_H-L (eV)	Δ_LUMO (eV)	EA (eV)	IP(eV)	λ_e (eV)	λ_h (eV)	λ_in (eV)	E_OP (eV)	f	λ_max(nm)	E_b (eV)	V_OC (V)	V_DA (eV)	ΔG_CS (eV)	ΔG_CR (eV)	K_CS (s^-1)	K_CR (s^-1)	E_loss (eV)	Δμ (Dy)
A1-D1-A1	-5.761	-3.738	-3.469	2.023	0.269	3.056	-	0.067	0.117	0.184	1.69373	2.116	732.11	0.33	1.298	0.588657	-0.805	-1.523	1036808674103630	3.05695e+06	0.395735	0.59041
A1-D1-A2	-5.76	-3.729	-3.459	2.031	0.27	3.041	-	0.069	0.117	0.186	1.70461	2.11	727.44	0.327	1.307	0.648543	-0.795	-1.533	1677277314380100	3.2987e+06	0.397608	0.757499
A1-D1-A3	-5.741	-3.741	-3.469	2	0.272	3.074	-	0.062	0.117	0.179	1.67244	2.161	741.43	0.328	1.295	0.584864	-0.806	-1.522	659424018254585	1.44716e+06	0.377444	0.634348
A1-D1-A4	-5.731	-3.713	-3.429	2.018	0.284	3.023	-	0.067	0.117	0.184	1.69821	2.159	730.18	0.32	1.323	0.479823	-0.774	-1.554	1510805111151260	816936	0.375211	0.839743
A1-D1-A5	-5.635	-3.595	-3.348	2.04	0.247	2.897	-	0.069	0.117	0.186	1.71344	1.936	723.69	0.327	1.441	0.477869	-0.653	-1.675	2179447304212580	1912.96	0.272441	1.4652
A2-D1-A2	-5.758	-3.72	-3.449	2.038	0.271	3.025	-	0.071	0.117	0.188	1.71607	2.101	722.58	0.322	1.316	0.484722	-0.786	-1.542	1516394827437650	2.11327e+06	0.400073	0.815428
A2-D1-A3	-5.739	-3.733	-3.458	2.006	0.275	3.059	-	0.063	0.117	0.18	1.68193	2.152	737.25	0.324	1.303	0.64157	-0.797	-1.531	890306475520708	1.27245e+06	0.378926	0.783451
A2-D1-A4	-5.729	-3.703	-3.419	2.026	0.284	3.007	-	0.069	0.117	0.186	1.70973	2.156	725.26	0.317	1.333	0.563734	-0.764	-1.564	1336389430817800	487810	0.376732	0.931504
A2-D1-A5	-5.632	-3.581	-3.343	2.051	0.238	2.877	-	0.072	0.117	0.189	1.72822	1.919	717.5	0.323	1.455	0.429142	-0.638	-1.69	1842512258608820	967.327	0.273223	1.57802
A3-D1-A3	-5.72	-3.745	-3.47	1.975	0.275	2.091	-	0.057	0.117	0.174	1.65126	2.195	750.94	0.324	1.291	0.672368	-0.806	-1.522	1078810428664890	1.65613e+06	0.360264	0.720629
A3-D1-A4	-5.71	-3.717	-3.427	1.993	0.29	3.042	-	0.061	0.117	0.178	1.67552	2.207	740.07	0.318	1.319	0.475855	-0.776	-1.552	1599263610494370	611403	0.356517	1.00672
A3-D1-A5	-5.616	-3.607	-3.344	2.009	0.263	2.922	-	0.063	0.117	0.18	1.68953	2.02	733.93	0.32	1.429	0.447699	-0.661	-1.667	3738012222864450	2818.82	0.260534	1.64928
A4-D1-A4	-5.694	-3.683	-3.384	2.011	0.299	2.986	-	0.066	0.117	0.183	1.7015	2.176	728.77	0.31	1.353	0.598478	-0.742	-1.586	3160821774553450	273446	0.348497	1.02613
A4-D1-A5	-5.599	-3.56	-3.318	2.039	0.242	2.857	-	0.069	0.117	0.186	1.72174	1.969	720.2	0.318	1.476	0.571108	-0.613	-1.715	6413605623683270	640.759	0.245744	1.67803
A5-D1-A5	-5.503	-3.411	-3.268	2.092	0.143	2.72	-	0.072	0.117	0.189	1.73884	1.527	713.12	0.353	1.625	0.513276	-0.453	-1.875	8913121218058530	0.224511	0.113838	2.32274
A1-D2-A1	-5.714	-3.673	-3.421	2.041	0.252	2.982	-	0.063	0.117	0.18	1.70957	2.199	725.33	0.332	1.363	0.509934	-0.753	-1.575	1991467191030670	247657	0.346567	0.49863
A1-D2-A2	-5.712	-3.664	-3.41	2.048	0.254	2.965	-	0.064	0.117	0.181	1.72036	2.188	720.78	0.328	1.372	0.621215	-0.743	-1.585	1693342541058230	131315	0.348359	0.538992
A1-D2-A3	-5.693	-3.677	-3.422	2.016	0.255	3.001	-	0.057	0.117	0.174	1.68818	2.256	734.52	0.328	1.359	0.569391	-0.755	-1.573	1840081085936320	156813	0.329177	0.430663
A1-D2-A4	-5.678	-3.643	-3.376	2.035	0.267	2.944	-	0.062	0.117	0.179	1.71373	2.214	723.57	0.322	1.393	0.61784	-0.722	-1.606	2362027022158250	48194.8	0.320725	0.584892
A1-D2-A5	-5.584	-3.534	-3.283	2.05	0.251	2.821	-	0.064	0.117	0.181	1.72639	1.995	718.26	0.324	1.502	0.523708	-0.604	-1.724	2662376604997280	94.7796	0.224394	1.11325
A2-D2-A2	-5.709	-3.653	-3.4	2.056	0.253	2.948	-	0.066	0.117	0.183	1.73216	2.178	715.87	0.324	1.383	0.46113	-0.733	-1.595	3528269912186970	186218	0.349158	0.503304
A2-D2-A3	-5.691	-3.667	-3.41	2.024	0.257	2.985	-	0.059	0.117	0.176	1.69784	2.245	730.34	0.326	1.369	0.558417	-0.746	-1.582	2376878232152890	143852	0.328839	0.522494
A2-D2-A4	-5.676	-3.632	-3.366	2.044	0.266	2.926	-	0.064	0.117	0.181	1.72579	2.213	718.51	0.318	1.404	0.673836	-0.711	-1.617	3465094610232590	45792.6	0.321794	0.563959
A2-D2-A5	-5.581	-3.518	-3.277	2.063	0.241	2.8	-	0.067	0.117	0.184	1.74177	1.978	711.92	0.322	1.518	0.428053	-0.588	-1.74	6734269226492860	138.553	0.223769	1.19712
A3-D2-A3	-5.672	-3.681	-3.422	1.991	0.259	3.019	-	0.053	0.117	0.17	1.66691	2.302	743.89	0.324	1.355	0.553659	-0.757	-1.571	1495473395746130	102495	0.311913	0.454783
A3-D2-A4	-5.657	-3.649	-3.373	2.008	0.276	2.965	-	0.057	0.117	0.174	1.69087	2.272	733.35	0.317	1.387	0.547978	-0.725	-1.603	1505751770873110	23426.4	0.303871	0.743147
A3-D2-A5	-5.565	-3.546	-3.278	2.019	0.268	2.848	-	0.058	0.117	0.175	1.7025	2.096	728.34	0.317	1.49	0.569228	-0.615	-1.713	5484217297643570	186.597	0.212502	1.31173
A4-D2-A4	-5.641	-3.61	-3.33	2.031	0.28	2.904	-	0.062	0.117	0.179	1.71859	2.236	721.52	0.313	1.426	0.538448	-0.689	-1.639	2377139194657360	7720.16	0.292594	0.610095
A4-D2-A5	-5.548	-3.493	-3.251	2.055	0.242	2.778	-	0.064	0.117	0.181	1.73699	2.037	713.88	0.318	1.543	0.617823	-0.563	-1.765	6152725928530820	22.6927	0.193987	1.2858
A5-D2-A5	-5.452	-3.342	-3.204	2.11	0.138	2.64	-	0.066	0.117	0.183	1.75327	1.559	707.25	0.357	1.694	0.504135	-0.404	-1.924	4267085994101070	0.00321604	0.0592697	1.97095
A1-D3-A1	-5.842	-3.749	-3.515	2.093	0.234	3.072	-	0.066	0.117	0.183	1.75431	2.116	706.83	0.339	1.287	0.489036	-0.839	-1.489	520204688981169	9.25313e+06	0.467312	1.0828
A1-D3-A2	-5.84	-3.74	-3.504	2.1	0.236	3.057	-	0.067	0.117	0.184	1.7648	2.103	702.63	0.335	1.296	0.479748	-0.831	-1.497	460388372560630	5.63008e+06	0.468798	1.30636
A1-D3-A3	-5.818	-3.75	-3.514	2.068	0.236	3.088	-	0.06	0.117	0.177	1.73315	2.168	715.46	0.335	1.286	0.43331	-0.839	-1.489	377844398655982	4.57936e+06	0.447151	1.19021
A1-D3-A4	-5.806	-3.719	-3.474	2.087	0.245	3.035	-	0.065	0.117	0.182	1.75767	2.122	705.48	0.33	1.317	0.578184	-0.81	-1.518	1043814561916180	3.52594e+06	0.440669	1.44536
A1-D3-A5	-5.715	-3.615	-3.362	2.1	0.253	2.916	-	0.068	0.117	0.185	1.77021	1.924	700.48	0.33	1.421	0.540978	-0.698	-1.63	2511185441826840	23230.5	0.349215	2.09325
A2-D3-A2	-5.839	-3.73	-3.495	2.109	0.235	3.041	-	0.07	0.117	0.187	1.77643	2.091	698.03	0.333	1.306	0.418269	-0.822	-1.506	539628273440149	4.91272e+06	0.470428	1.48357
A2-D3-A3	-5.817	-3.741	-3.504	2.076	0.237	3.073	-	0.062	0.117	0.179	1.74248	2.155	711.63	0.334	1.295	0.451292	-0.831	-1.497	446561639942060	3.94356e+06	0.447479	1.41176
A2-D3-A4	-5.804	-3.709	-3.464	2.095	0.245	3.019	-	0.067	0.117	0.184	1.76933	2.116	700.83	0.326	1.327	0.403021	-0.8	-1.528	524565960858828	1.17647e+06	0.442331	1.60306
A2-D3-A5	-5.713	-3.6	-3.358	2.113	0.242	2.896	-	0.07	0.117	0.187	1.78615	1.916	694.23	0.327	1.436	0.36898	-0.682	-1.646	1019894740629160	4745.03	0.350152	2.25682
A3-D3-A3	-5.796	-3.752	-3.515	2.044	0.237	3.104	-	0.056	0.117	0.173	1.71205	2.21	724.28	0.332	1.284	0.394399	-0.839	-1.489	402466161353372	3.75656e+06	0.428045	1.32997
A3-D3-A4	-5.783	-3.722	-3.469	2.061	0.253	3.054	-	0.06	0.117	0.177	1.73546	2.212	714.51	0.326	1.314	0.498388	-0.811	-1.517	915009001790977	2.30611e+06	0.421455	1.69596
A3-D3-A5	-5.695	-3.626	-3.357	2.069	0.269	2.94	-	0.062	0.117	0.179	1.74559	2.012	710.36	0.324	1.41	0.403929	-0.706	-1.622	2393112483148230	20030.9	0.335594	2.27243
A4-D3-A4	-5.77	-3.688	-3.433	2.082	0.255	2.998	-	0.065	0.117	0.182	1.76126	2.132	704.04	0.321	1.348	0.601972	-0.779	-1.549	1236918821426680	757097	0.413264	1.7029
A4-D3-A5	-5.68	-3.576	-3.333	2.104	0.243	2.875	-	0.068	0.117	0.185	1.77974	1.964	696.73	0.325	1.46	0.394995	-0.658	-1.67	2558284131859400	2673.13	0.319743	2.36113
A5-D3-A5	-5.589	-3.42	-3.283	2.169	0.137	2.737	-	0.071	0.117	0.188	1.80453	1.586	687.16	0.365	1.616	0.414069	-0.494	-1.834	2939975392573830	0.590817	0.188529	3.03481
A1-D4-A1	-5.625	-3.652	-3.382	1.973	0.27	2.965	-	0.063	0.117	0.18	1.65758	2.213	748.08	0.316	1.384	0.622879	-0.728	-1.6	2724493316212570	84615.4	0.273577	0.632026
A1-D4-A2	-5.623	-3.642	-3.371	1.981	0.271	2.948	-	0.065	0.117	0.182	1.66842	2.206	743.22	0.313	1.394	0.595234	-0.718	-1.61	2868836629172590	60920.6	0.274416	0.582681
A1-D4-A3	-5.594	-3.648	-3.374	1.946	0.274	2.976	-	0.058	0.117	0.175	1.63429	2.264	758.74	0.312	1.388	0.621733	-0.731	-1.597	1573633137960160	37534.9	0.246288	0.356302
A1-D4-A4	-5.582	-3.62	-3.337	1.962	0.283	2.926	-	0.063	0.117	0.18	1.65497	2.117	749.26	0.307	1.416	0.631653	-0.697	-1.631	4226254705286020	23496.5	0.238966	0.489602
A1-D4-A5	-5.483	-3.5	-3.245	1.983	0.255	2.795	-	0.065	0.117	0.182	1.674	2.021	740.74	0.309	1.536	0.586998	-0.575	-1.753	10802681509153100	86.8056	0.138002	0.924253
A2-D4-A2	-5.62	-3.631	-3.36	1.989	0.271	2.93	-	0.067	0.117	0.184	1.68003	2.193	738.08	0.309	1.405	0.643584	-0.707	-1.621	3850431498905510	53267.5	0.275035	0.457109
A2-D4-A3	-5.591	-3.639	-3.362	1.952	0.277	2.96	-	0.06	0.117	0.177	1.64402	2.255	754.25	0.308	1.397	0.67954	-0.722	-1.606	3105421578198200	53170.3	0.247017	0.369105
A2-D4-A4	-5.579	-3.609	-3.326	1.97	0.283	2.909	-	0.065	0.117	0.182	1.6666	2.112	744.03	0.304	1.427	0.603425	-0.686	-1.642	2769863554530070	10086.6	0.239599	0.238965
A2-D4-A5	-5.48	-3.484	-3.239	1.996	0.245	2.773	-	0.068	0.117	0.185	1.68873	1.998	734.28	0.308	1.552	0.46062	-0.559	-1.769	2681932542213490	12.6889	0.136729	0.97422
A3-D4-A3	-5.575	-3.653	-3.374	1.922	0.279	2.995	-	0.054	0.117	0.171	1.61343	2.307	768.55	0.309	1.383	0.439322	-0.734	-1.594	1484717293989620	29609	0.230428	0.29672
A3-D4-A4	-5.559	-3.62	-3.324	1.939	0.296	2.94	-	0.058	0.117	0.175	1.63709	2.278	757.44	0.302	1.416	0.553405	-0.701	-1.627	2965399810479610	12991.1	0.221093	0.590002
A3-D4-A5	-5.466	-3.513	-3.241	1.953	0.272	2.823	-	0.059	0.117	0.176	1.65065	2.12	751.22	0.303	1.523	0.544298	-0.586	-1.742	5461122087525840	40.5472	0.127648	1.1322
A4-D4-A4	-5.541	-3.58	-3.278	1.961	0.302	2.886	-	0.063	0.117	0.18	1.66485	2.249	744.81	0.296	1.456	0.658581	-0.663	-1.665	3982772624202240	3355.94	0.208854	0.352857
A4-D4-A5	-5.447	-3.46	-3.212	1.987	0.248	2.751	-	0.066	0.117	0.183	1.68439	2.057	736.17	0.303	1.576	0.696513	-0.534	-1.794	11349778607802400	10.7679	0.108394	1.06246
A5-D4-A5	-5.351	-3.312	-3.167	2.039	0.145	2.613	-	0.067	0.117	0.184	1.6987	1.575	729.97	0.341	1.724	0.616078	-0.377	-1.951	7244120929969160	0.00144416	-0.0253001	1.73132
PM6	-5.336	-	-	-	-	-	6.12	-	-	-	-		-	-	-	-	-	-	-	-	-	-
